# Supplementary material for: Crystal structure engineering of Prussian blue through a double-acting chelating agent for energy storage devices
Source: Royal Society of Chemistry journal article supplement (doi:10.1039/d4tc04475d), 2025-01-01
Supplement: d4tc04475d1.pdf [file d4tc04475d1.pdf]

## Supporting information

### Crystal structure engineering of prussian blue through double-acting chelating agent for energy storage devices

Jinbo Zhu <sup>a#</sup>, Zanyu Sun <sup>a#</sup>, Yuhang Wang <sup>a</sup>, Feng Ye <sup>a</sup>, Weihua Guo <sup>a</sup>, Ruoxin Li <sup>a,b\*</sup>,

Guangtao Chang <sup>a,b,c\*</sup>

<sup>a</sup> College of Textile and Clothing Engineering, Soochow University, Suzhou 215000, China.

<sup>b</sup> Jiangsu Engineering Research Center of Textile Dyeing and Printing for Energy Conservation, Discharge Reduction and Cleaner Production (ERC), Soochow University, Suzhou 215123, China.

<sup>c</sup> State Key Laboratory of Molecular Engineering of Polymers (Fudan University), Shanghai 200438, China.

# Equal Contribution;

**Corresponding Author:** Guangtao Chang, [Changgt@suda.edu.cn](mailto:Changgt@suda.edu.cn); Ruoxin Li,

[liruoxin@suda.edu.cn](mailto:liruoxin@suda.edu.cn).

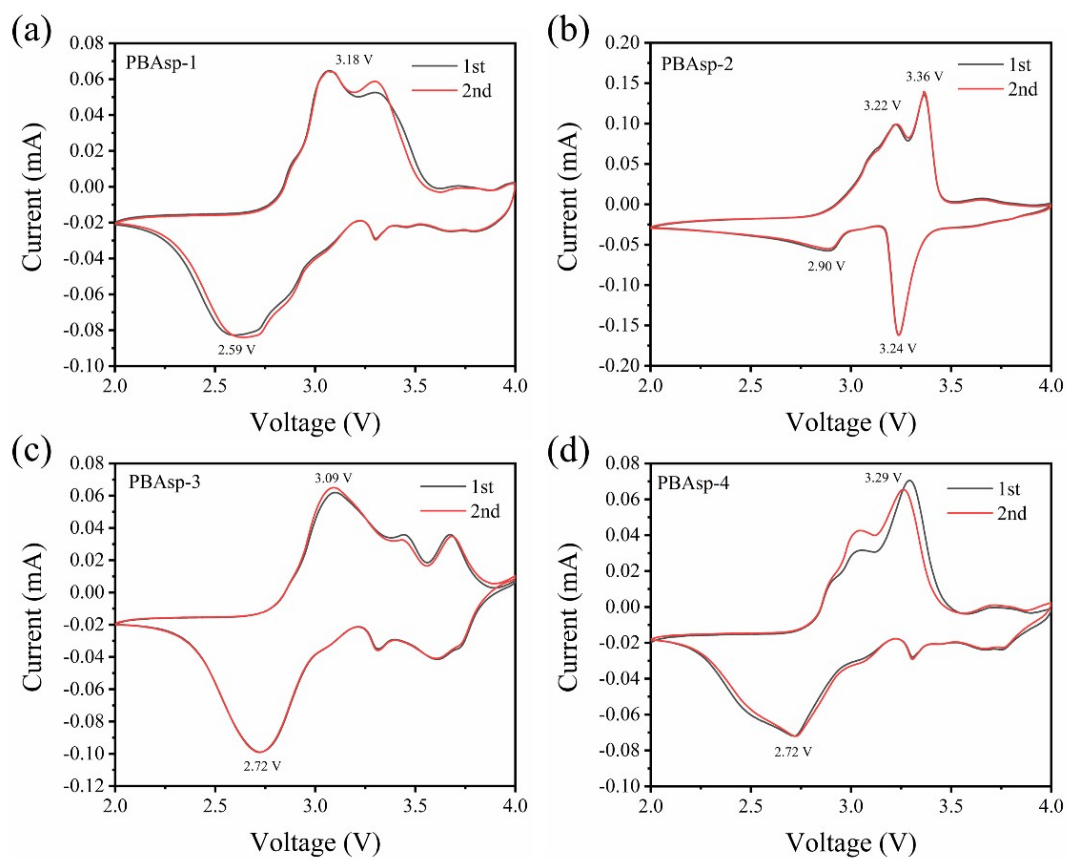

**Fig. S1.** CV curves of the first two cycles for (a) PBAsp-1, (b) PBAsp-2, (c) PBAsp-3 and (d) PBAsp-4 electrodes from 2.0 to 4.0 V at a scan rate of  $0.1 \text{ mV s}^{-1}$ .

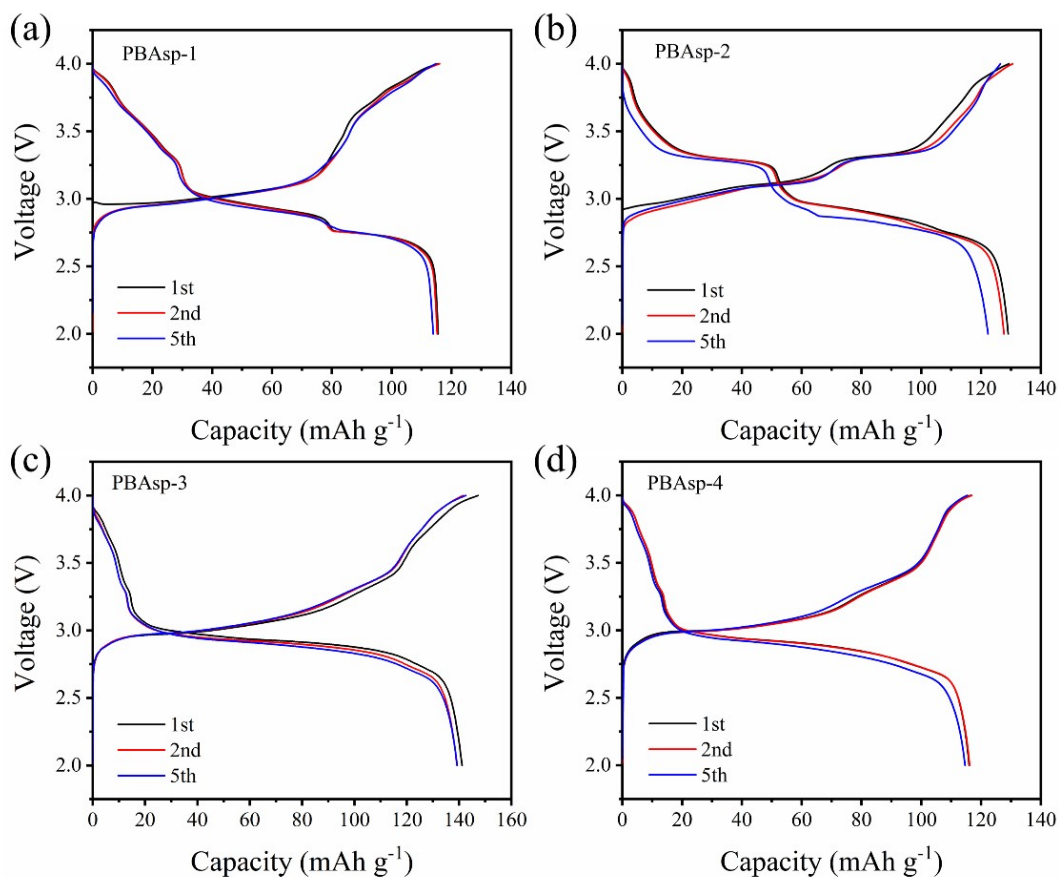

**Fig. S2.** Charge and discharge curves of first three cycles for from 2.0 to 4.0 V at 50mA  $g^{-1}$ : (a) PBAsP-1, (b) PBAsP-2, (c) PBAsP-3, (d) PBAsP-4.

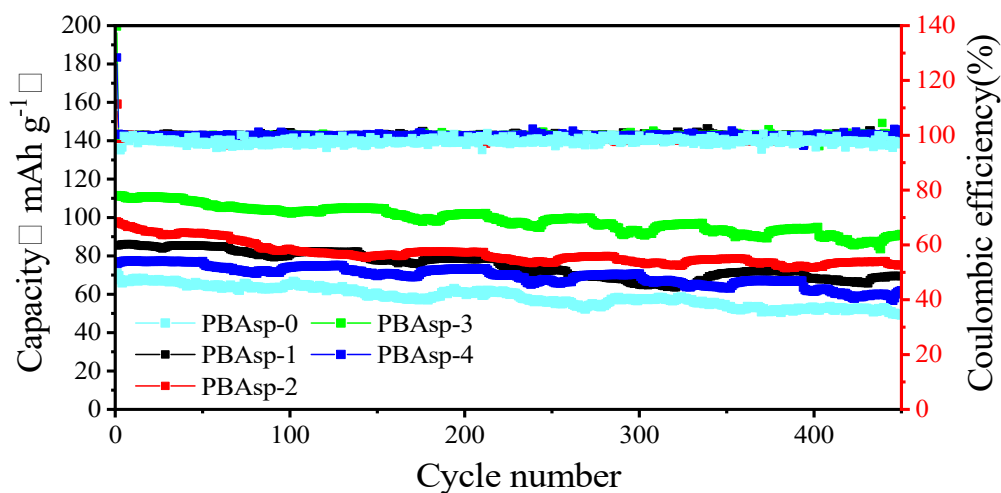

**Fig. S3.** Cycle performance of PBAsP-0; PBAsP-1; PBAsP-2; PBAsP-3 and PBAsP-4 electrodes at 500 mA  $g^{-1}$  in the voltage range of 2.0-4.0 V.

**Table S1.** Ratio of Fe<sup>2+</sup> and Fe<sup>3+</sup> in all samples

| Samples | Fe <sup>2+</sup> | Fe <sup>3+</sup> |
|---------|------------------|------------------|
| PBAsp-1 | 31.4%            | 69.6%            |
| PBAsp-2 | 48.5%            | 51.5%            |
| PBAsp-3 | 58.2%            | 41.8%            |
| PBAsp-4 | 57.0%            | 43.0%            |

**Table S2.** The calculated resistance based on the Nyquist curves of as-prepared samples.

| Samples | $R_s$ ( $\Omega$ ) | $R_{ct}$ ( $\Omega$ ) |
|---------|--------------------|-----------------------|
| PBAsp-1 | 18.18              | 1539                  |
| PBAsp-2 | 13.77              | 1076                  |
| PBAsp-3 | 11.09              | 963.1                 |
| PBAsp-4 | 4.82               | 215.6                 |

**Table S3.** Comparison of the performance of various chelating agents for the preparation of Prussian blue.

| Samples                           | Utilization rate | Capacity(1C)            | Cycle life       |
|-----------------------------------|------------------|-------------------------|------------------|
| this work                         | 4.4 g            | 131 mAh g <sup>-1</sup> | 81.81%, 450 (5C) |
| sodium citrate <sup>1</sup>       | 13.04 g          | 100 mAh g <sup>-1</sup> | 71%, 500 (1C)    |
| sodium pyrophosphate <sup>2</sup> | 26.36 g          | 124 mAh g <sup>-1</sup> | 80.6%, 100 (1C)  |
| EDTA <sup>3</sup>                 | 11.2 g           | 151 mAh g <sup>-1</sup> | 84%, 100 (1C)    |

## References

- 1 S. Lim, D. Choi, T. Jeong and D. Han, *J. Alloys Compd.*, 2023, **938**, 168502.
- 2 J. Peng, J. Huang, Y. Gao, Y. Qiao, H. Dong, Y. Liu, L. Li, J. Wang, S. Dou and S. Chou, *Small*, 2023, **19**, 2300435.
- 3 Z.G. Neale, C. Liu and G. Cao, *Sustain. Energy Fuels*, 2020, **4**, 2884–2891.

**Table S4.** Comparison of the cost of using aspartic acid and sodium citrate.

| Samples        | Price (RMB/ton) | Utilization rate (g) | Usage cost (RMB) |
|----------------|-----------------|----------------------|------------------|
| aspartic acid  | 25000           | 4.4                  | 0.11             |
| sodium citrate | 5100            | 13.04                | 0.067            |

Note: The above calculations are based on equal masses of sodium ferrocyanide, prepared to produce the same yield of Prussian blue obtained.
